# Supplementary material for: Exploring Entertainment Medicine and Professionalization of Self-Care: Interview Study Among Doctors on the Potential Effects of Digital Self-Tracking
Source: PubMed Central journal article supplement (PMC5786746; doi:10.2196/jmir.8040), 2018-01-12
Supplement: jmir_v20i1e10_app3.pdf [file jmir_v20i1e10_app3.pdf]

### APPENDIX 3: Coding Scheme

|                        |                                 |                                       |            |
|------------------------|---------------------------------|---------------------------------------|------------|
| patient as manager     | opportunities                   | motivation                            |            |
|                        |                                 | behavioral change                     |            |
|                        |                                 | therapy adjustment                    |            |
|                        |                                 | self-care                             |            |
|                        |                                 | reassurance                           |            |
|                        |                                 | increased insight/understanding       |            |
|                        |                                 | screening                             |            |
|                        | concerns                        | distress                              |            |
|                        |                                 | unsustained motivation                |            |
|                        |                                 | only a "happy few" benefit            |            |
|                        |                                 | not for the elderly                   |            |
|                        |                                 | increased health gap                  |            |
|                        |                                 | false reassurance                     |            |
|                        |                                 | confrontation                         |            |
|                        |                                 | drop-out                              |            |
| interpretation of data |                                 |                                       |            |
| loss of autonomy       |                                 |                                       |            |
| factors                | computer literacy               |                                       |            |
|                        | patient variability             |                                       |            |
|                        | need for guidance and education |                                       |            |
| health obsession       | who takes the initiative        | worried well                          |            |
|                        |                                 | sports and exercise enthusiasts       |            |
|                        | concerns                        | "Matthew effect"                      |            |
|                        |                                 | device dependence                     |            |
|                        |                                 | time investment                       |            |
|                        |                                 | "Quantified Self"                     |            |
|                        |                                 | medicalization                        |            |
|                        |                                 | unnecessary examination               |            |
|                        | opportunities                   | behavioral change                     |            |
|                        |                                 | screening                             |            |
|                        |                                 | patient safety                        |            |
|                        |                                 | better quality of health              |            |
|                        | commercial health apps          | "entertainment" medicine              |            |
|                        |                                 | lack of evidence-based medicine (EBM) |            |
|                        |                                 | overabundance of apps                 |            |
| information            | devices                         | concerns                              | complexity |

|                              |                                |                       |                                  |
|------------------------------|--------------------------------|-----------------------|----------------------------------|
| management                   |                                |                       | data quality                     |
|                              |                                |                       | lack of norms and regulations    |
|                              |                                |                       | privacy, security                |
|                              |                                | coping strategies     | comparison across devices        |
|                              |                                |                       | manufacturer, brand              |
|                              |                                |                       | professional recommendation      |
|                              |                                | factors               | use of EBM                       |
|                              |                                |                       | accuracy                         |
|                              |                                |                       | government labeling              |
|                              | data                           | concerns              | quality, accuracy                |
|                              |                                |                       | variation across devices         |
|                              |                                |                       | patient interpretation           |
|                              |                                |                       | information overload             |
|                              |                                |                       | lack of context                  |
|                              |                                |                       | complexity                       |
|                              |                                |                       | impact of automation             |
|                              |                                | opportunities         | more data                        |
|                              |                                |                       | better quality data              |
|                              |                                |                       | telemonitoring                   |
|                              |                                |                       | revalidation                     |
|                              |                                |                       | automation potential             |
|                              |                                |                       | patient safety                   |
|                              |                                | factors               | better diagnostics and screening |
| patients' level of education |                                |                       |                                  |
| information relevance        |                                |                       |                                  |
| use of EBM                   |                                |                       |                                  |
| algorithms employed          |                                |                       |                                  |
| information context          |                                |                       |                                  |
| data sharing                 | social media                   | legal framework       |                                  |
|                              |                                | support group         |                                  |
|                              |                                | patient motivation    |                                  |
|                              | electronic health record (EHR) | risk of bad advice    |                                  |
|                              |                                | more data             |                                  |
|                              |                                | decision support      |                                  |
|                              |                                | chronic care          |                                  |
|                              |                                | source identification |                                  |
|                              | more relevant data             |                       |                                  |

|                                              |                                       |                                      |                                   |  |
|----------------------------------------------|---------------------------------------|--------------------------------------|-----------------------------------|--|
|                                              |                                       |                                      | time consumption                  |  |
|                                              |                                       |                                      | risk of data overload             |  |
| care provider's shifting role                | doctor                                | concerns                             | time investment                   |  |
|                                              |                                       |                                      | fear of being "always on"         |  |
|                                              |                                       |                                      | responsibility for data           |  |
|                                              |                                       |                                      | data overload                     |  |
|                                              |                                       | opportunities                        | time savings                      |  |
|                                              |                                       |                                      | automation                        |  |
|                                              |                                       |                                      | opportunity for being "always on" |  |
|                                              |                                       | factors                              | feedback to doctor                |  |
|                                              |                                       |                                      | patient communication             |  |
|                                              |                                       |                                      | doctors' education                |  |
|                                              |                                       |                                      | financial compensation            |  |
|                                              |                                       | expected impact on professional care |                                   |  |
|                                              | impact on patient-doctor relationship | trust                                |                                   |  |
|                                              |                                       | personal relations                   |                                   |  |
|                                              |                                       | risk for paternalism                 |                                   |  |
| expected impact on physician authority       |                                       |                                      |                                   |  |
| frequency of consults                        | increase?                             |                                      |                                   |  |
|                                              | decrease?                             |                                      |                                   |  |
| financial impact                             | burden?                               |                                      |                                   |  |
|                                              | saving?                               |                                      |                                   |  |
| self-tracking as supplement, not replacement |                                       |                                      |                                   |  |
